# Supplementary material for: Emergency obstetric and newborn care signal functions in public and private facilities in Bangladesh
Source: PLoS One. 2017 Nov 1;12(11):e0187238. doi: 10.1371/journal.pone.0187238 (PMC5665531; doi:10.1371/journal.pone.0187238)
Supplement: S2 Fig — (XLSX) [file pone.0187238.s004.xlsx]

## Sheet: Fig 3
Data for Figure 3
		EmONC signal functions																						Fig 3. Population coverage of signal functions for EmONC in the private facilities in the last 3 months prior to the date of assessment in the 24 study districts of Bangladesh
Districts	Population	CS delivery	Blood transfusion	Parenteral antibiotics	Parenteral oxytocics	Parenteral anticonvulsants	Manual removal of placenta	Removal of retained products	Assisted vaginal delivery	Neonatal resuscitation
		Number of private facilities had signal functions
Bagerhat	1476090	29	25	36	35	15	27	14	1	9
Bandarban	388335	0	0	0	0	0	0	0	0	0
Barguna	892781	2	1	3	3	1	0	3	0	2
Bhola	1776795	5	4	8	9	2	9	6	3	2
Cox’s Bazar	2289990	14	15	21	22	15	18	11	2	18
Gaibandha	2379255	12	11	13	12	7	10	9	0	11
Habiganj	2089001	7	4	8	11	2	6	4	0	5
Jamalpur	2292674	17	15	18	18	5	9	17	0	14
Khagrachhari	613917	1	1	1	2	0	0	1	0	0
Khulna	2318527	72	53	76	76	23	40	45	1	29
Kurigram	2069273	11	11	11	11	9	5	6	1	9
Maulvibazar	1919062	25	18	28	29	16	17	24	5	16
Narail	721668	20	13	19	19	12	10	11	0	10
Netrakona	2229642	7	5	7	7	2	3	6	0	7
Nilphamari	1834231	11	10	11	10	2	7	8	0	7
Panchagarh	987644	8	6	8	7	1	5	8	0	6
Patuakhali	1535854	10	10	12	12	7	8	11	2	8
Rangamati	595979	4	4	4	4	2	3	4	1	3
Rangpur	2881086	59	49	59	60	38	46	56	4	42
Satkhira	1985959	74	44	73	74	24	33	32	1	27
Sirajganj	3097489	27	18	27	27	11	13	21	1	16
Sunamganj	2467968	2	3	4	3	1	1	4	0	3
Sylhet	3434188	43	37	44	45	42	37	39	14	44
Thakurgaon	1390042	22	16	24	23	13	12	21	0	14
Overall	43667450	482	373	515	519	250	319	361	36	302
		EmONC signal functions
Districts	Population	CS delivery	Blood transfusion	Parenteral antibiotics	Parenteral oxytocics	Parenteral anticonvulsants	Manual removal of placenta	Removal of retained products	Assisted vaginal delivery	Neonatal resuscitation
		Number of private facilities per 500,000 population had signal functions
Bagerhat	1476090	9.82325	8.46832	12.1944	11.8556	5.08099	9.14578	4.74226	0.338733	3.04859
Bandarban	388335	0	0	0	0	0	0	0	0	0
Barguna	892781	1.1201	0.560048	1.68014	1.68014	0.560048	0	1.68014	0	1.1201
Bhola	1776795	1.40703	1.12562	2.25124	2.53265	0.562811	2.53265	1.68843	0.844217	0.562811
Cox’s Bazar	2289990	3.05678	3.27512	4.58517	4.80351	3.27512	3.93015	2.40176	0.436683	3.93015
Gaibandha	2379255	2.5218	2.31165	2.73195	2.5218	1.47105	2.1015	1.89135	0	2.31165
Habiganj	2089001	1.67544	0.957395	1.91479	2.63284	0.478698	1.43609	0.957395	0	1.19674
Jamalpur	2292674	3.70746	3.27129	3.92555	3.92555	1.09043	1.96277	3.70746	0	3.0532
Khagrachhari	613917	0.814442	0.814442	0.814442	1.62888	0	0	0.814442	0	0
Khulna	2318527	15.5271	11.4297	16.3897	16.3897	4.96005	8.62617	9.70444	0.215654	6.25397
Kurigram	2069273	2.65794	2.65794	2.65794	2.65794	2.17468	1.20815	1.44978	0.241631	2.17468
Maulvibazar	1919062	6.5136	4.68979	7.29523	7.55577	4.1687	4.42925	6.25305	1.30272	4.1687
Narail	721668	13.8568	9.00691	13.1639	13.1639	8.31407	6.92839	7.62123	0	6.92839
Netrakona	2229642	1.56976	1.12126	1.56976	1.56976	0.448502	0.672754	1.34551	0	1.56976
Nilphamari	1834231	2.99853	2.72594	2.99853	2.72594	0.545188	1.90816	2.18075	0	1.90816
Panchagarh	987644	4.05004	3.03753	4.05004	3.54379	0.506255	2.53128	4.05004	0	3.03753
Patuakhali	1535854	3.25552	3.25552	3.90662	3.90662	2.27886	2.60441	3.58107	0.651104	2.60441
Rangamati	595979	3.35582	3.35582	3.35582	3.35582	1.67791	2.51687	3.35582	0.838956	2.51687
Rangpur	2881086	10.2392	8.50374	10.2392	10.4127	6.59474	7.9831	9.71856	0.694183	7.28892
Satkhira	1985959	18.6308	11.0778	18.379	18.6308	6.04242	8.30833	8.05656	0.251768	6.79772
Sirajganj	3097489	4.35837	2.90558	4.35837	4.35837	1.77563	2.09847	3.38984	0.161421	2.58274
Sunamganj	2467968	0.405192	0.607787	0.810383	0.607787	0.202596	0.202596	0.810383	0	0.607787
Sylhet	3434188	6.26058	5.38701	6.40617	6.55177	6.11498	5.38701	5.6782	2.03833	6.40617
Thakurgaon	1390042	7.91343	5.75522	8.63283	8.27313	4.67612	4.31642	7.55373	0	5.03582
Overall	43667450	5.51898	4.27092	5.89684	5.94264	2.86254	3.65261	4.13351	0.412206	3.45795
Fig 3. Population coverage of signal functions for EmONC in the private facilities in the last 3 months prior to the date of assessment in the 24 study districts of Bangladesh
